# Supplementary material for: Characterization of Lactobacilli Phage Endolysins and Their Functional Domains–Potential Live Biotherapeutic Testing Reagents
Source: MDPI journal article supplement (doi:10.3390/v15101986), 2023-09-23
Supplement: s1 [file s1]

# **Characterization of Lactobacilli Phage Endolysins and Their Functional Domains – Potential Reagents for Live Biotherapeutic Product Microbiological Testing**

Robert J. Dorosky<sup>a\*</sup>, Stephanie L. Lola<sup>a</sup>, Haleigh A. Brown<sup>a</sup>, Jeremy E. Schreier<sup>b</sup>, Sheila M. Dreher-Lesnick<sup>a</sup>, and Scott Stibitz<sup>a</sup>

<sup>a</sup>Office of Vaccines Research and Review, Division of Bacterial, Parasitic and Allergenic Products, Center for Biologics Evaluation and Research, U.S. Food and Drug Administration, Silver Spring, MD 20993, USA

<sup>b</sup>Department of Marine Sciences, University of Georgia, Athens, GA 30602, USA

\* Correspondence

## **Supplemental Figures**

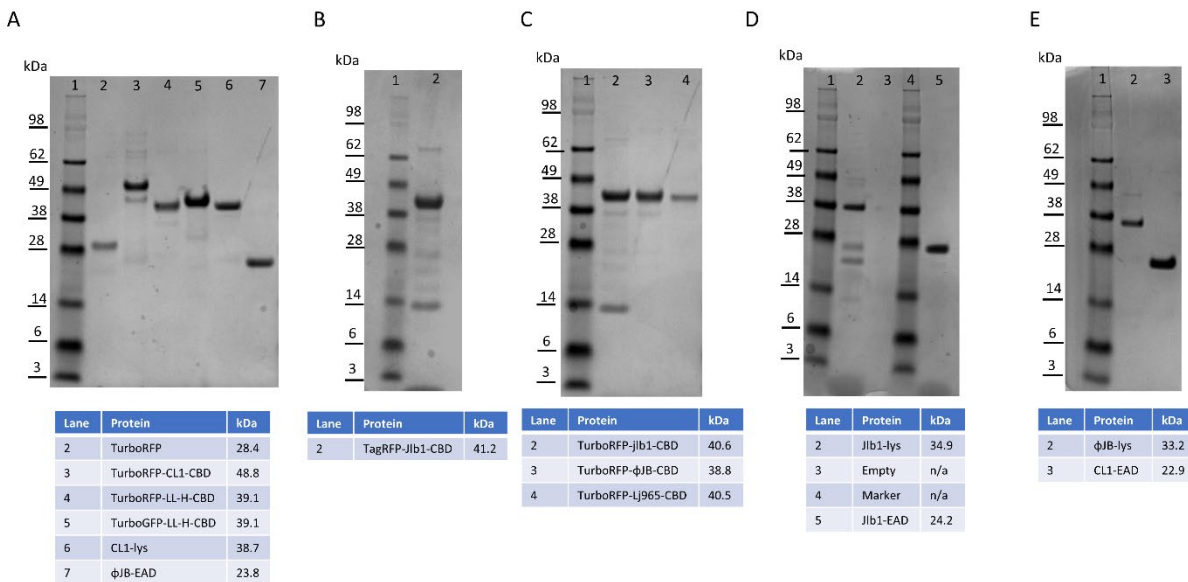

**Figure S1. SDS PAGE gels showing purified lysins, CBDs, and EADs.** Proteins were loaded on NupAGE 4-12% BisTris gels and stained with Coomassie Blue. The expected molecular mass of each protein and the lane in which the purified protein was run in indicated in the boxes below the gels. Molecular weight markers are identified on the left. Please note that under boiling SDS conditions TurboRFP and TagRFP is known to fragment.

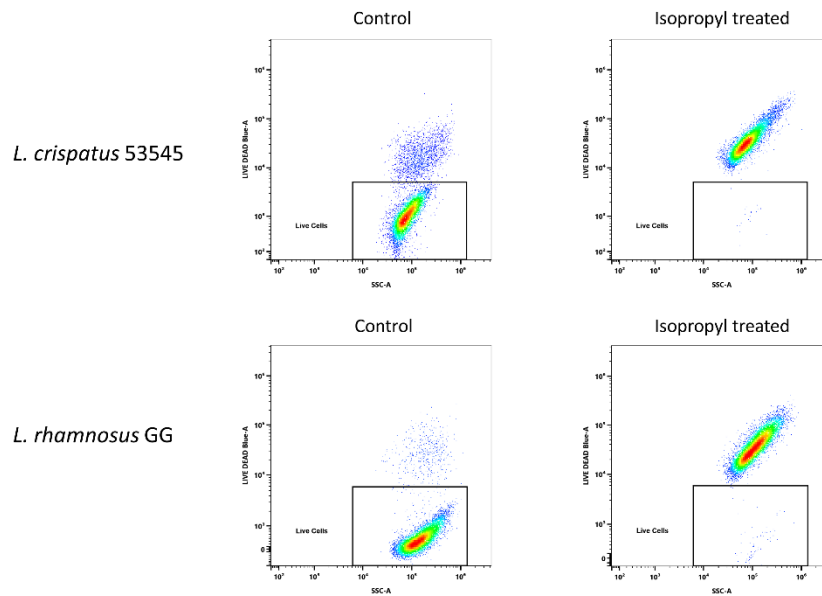

**Figure S2. Use of SYTOX Blue Live/Dead stain to distinguish live from dead cells.** SYTOX blue (ThermoFisher) is a cell impermeant nucleic acid stain that enters cells with damaged membranes and binds nucleic acids. (Top) untreated *L. crispatus* 53545 control (Left) and (Right) isopropyl alcohol treated cells (70%, 5 min). (Bottom) Untreated *L. rhamnosus* GG control (Left) and (Right) isopropyl alcohol treated cells.

**Table S1. List of bacterial strains and plasmids used in this study**

| Bacterial Strains                          | Description     | Source |
|--------------------------------------------|-----------------|--------|
| <i>Lactobacillus gasseri</i> 19992         |                 | ATCC   |
| <i>Lactobacillus gasseri</i> 9857          |                 | ATCC   |
| <i>Lactobacillus gasseri</i> SJ-9E-US      |                 | BEI    |
| <i>Lactobacillus gasseri</i> SV-16A-US     |                 | BEI    |
| <i>Lactobacillus jensenii</i> 115-3-CHN    |                 | BEI    |
| <i>Lactobacillus jensenii</i> 208-1        |                 | BEI    |
| <i>Lactobacillus jensenii</i> SJ-7A-US     |                 | BEI    |
| <i>Lactobacillus crispatus</i> 125-2-CHN   |                 | BEI    |
| <i>Lactobacillus crispatus</i> 33197       |                 | ATCC   |
| <i>Lactobacillus crispatus</i> 53545       |                 | ATCC   |
| <i>Lactobacillus crispatus</i> MV-1A-US    |                 | BEI    |
| <i>Lactiplantibacillus plantarum</i> 8014  |                 | ATCC   |
| <i>Lactiplantibacillus plantarum</i> V     | Product isolate | [1]    |
| <i>Limosilactobacillus vaginalis</i> 49540 |                 | ATCC   |
| <i>Lactocaseibacillus casei</i> 393        |                 | ATCC   |

|                                                   |                                                                                                |                                         |
|---------------------------------------------------|------------------------------------------------------------------------------------------------|-----------------------------------------|
| <i>Enterococcus durans</i> RM62                   | Breast milk isolate, Identified by MALDI-TOF                                                   | This Study                              |
| <i>Limosilactobacillus reuteri</i> 53608          |                                                                                                | ATCC                                    |
| <i>Limosilactobacillus reuteri</i> BAA-2837       |                                                                                                | ATCC                                    |
| <i>Limosilactobacillus reuteri</i> CF-48-3A       |                                                                                                | BEI                                     |
| <i>Lactocaseibacillus rhamnosus</i> GG            |                                                                                                | ATCC                                    |
| <i>Lactocaseibacillus rhamnosus</i> LMS2-1        |                                                                                                | BEI                                     |
| <i>Lactobacillus acidophilus</i> C                | Product Isolate                                                                                | [1]                                     |
| <i>Lactobacillus acidophilus</i> V                | Product Isolate                                                                                | [1]                                     |
| <i>Lactobacillus delbrueckii sub lactis</i> 15808 |                                                                                                | ATCC                                    |
| <i>Lactococcus lactis</i> 11454                   |                                                                                                | ATCC                                    |
| <i>Lactobacillus johnsonii</i> 11506              |                                                                                                | ATCC                                    |
| <i>Lactobacillus johnsonii</i> 135-1-CHN          |                                                                                                | BEI                                     |
| <i>Escherichia coli</i> BL21                      |                                                                                                | Novagen                                 |
| <b>Plasmids</b>                                   | <b>Description</b>                                                                             | <b>Source/<br/>Accession<br/>Number</b> |
| pSDL221                                           | pET22b(+) containing 693bp fragment encoding TurboRFP cloned into XbaI and SacI                | This study /<br>OR372164                |
| pSDL218                                           | pET22b(+) containing 711bp fragment encoding TurboGFP cloned into XbaI and SacI                | This study /<br>OR372165                |
| pRJD193                                           | pET22b(+) containing 1298bp fragment that includes TurboRFP CL1 CBD gene fusion (AA 155-350)   | This study /<br>OR372166                |
| pRJD198                                           | pET22b(+) containing 1064bp fragment that includes TurboRFP jlb1 CBD gene fusion (AA 192-310)  | This study /<br>OR372167                |
| pSLL166                                           | pET22b(+) containing 1315bp fragment that includes TagRFP jlb1 CBD gene fusion (AA 192-310)    | This study /<br>OR372168                |
| pRJD209                                           | pET22b(+) containing 1052bp fragment that includes TurboRFP Lj965 CBD gene fusion (196-310)    | This study /<br>OR372169                |
| pRJD201                                           | pET22b(+) containing 1022bp fragment that includes TurboRFP LLh CBD gene fusion (AA 194-298)   | This study /<br>OR372170                |
| pSLL160                                           | pET22b(+) containing 1039bp fragment that includes TurboGFP LLh CBD gene fusion (AA 194-298)   | This study /<br>OR372172                |
| pRJD202                                           | pET22b(+) containing 1016bp fragment that includes TurboRFP phiJB CBD gene fusion (AA 192-294) | This study /<br>OR372171                |
| pRJD488                                           | pET22b(+) containing 1050bp fragment that includes CL1 lysin coding sequence                   | This study /<br>OR372173                |
| pRJD489                                           | pET22b(+) containing 629bp fragment including the CL1 EAD coding sequence (AA 1-205)           | This study /<br>OR372174                |

|         |                                                                                        |                       |
|---------|----------------------------------------------------------------------------------------|-----------------------|
| pRJD492 | pET22b(+) containing 930bp fragment that includes Jlb1 lysin coding sequence           | This study / OR372175 |
| pRJD493 | pET22b(+) containing 654bp fragment including the Jlb1 EAD coding sequence (AA 1-212)  | This study / OR372176 |
| pRJD490 | pET22b(+) containing 882bp fragment that includes PhiJB lysin coding sequence          | This study / OR372177 |
| pRJD491 | pET22b(+) containing 645bp fragment including the phiJB EAD coding sequence (AA 1-209) | This study / OR372178 |

## References

1. Dreher-Lesnick, S. M.; Schreier, J. E.; Stibitz, S., Development of phage lysin LysA2 for use in improved purity assays for live biotherapeutic products. *Viruses* **2015**, 7, (12), 6675-6688.
